# Supplementary material for: Prokaryote communities along a source-to-estuary river continuum in the Brazilian Atlantic Forest
Source: PeerJ journal article supplement (doi:10.7717/peerj.17900), 2024-08-13
Supplement: Supplemental_materials.pdf [file Supplemental_materials.pdf]

## Supplemental Materials

# Supplemental Figures

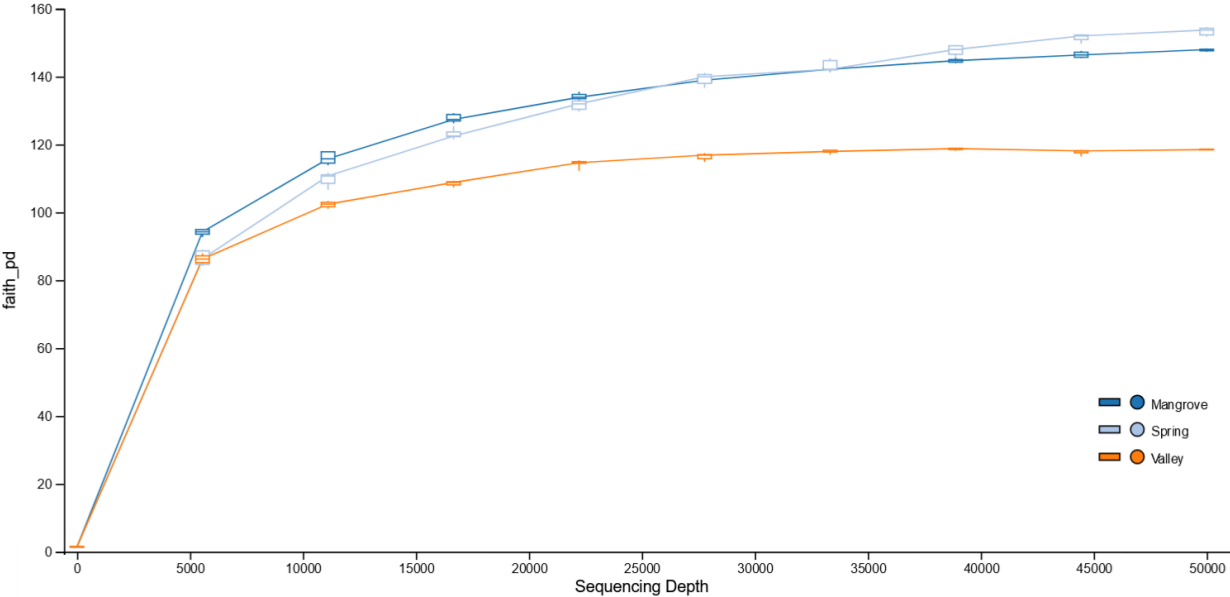

**Supplemental Figure 1. Faith PD alpha-diversity rarefaction curve for each site.** Based on the saturation of each site we set the rarefaction to 41K for the purposes of the alpha- and beta-diversity statistics.

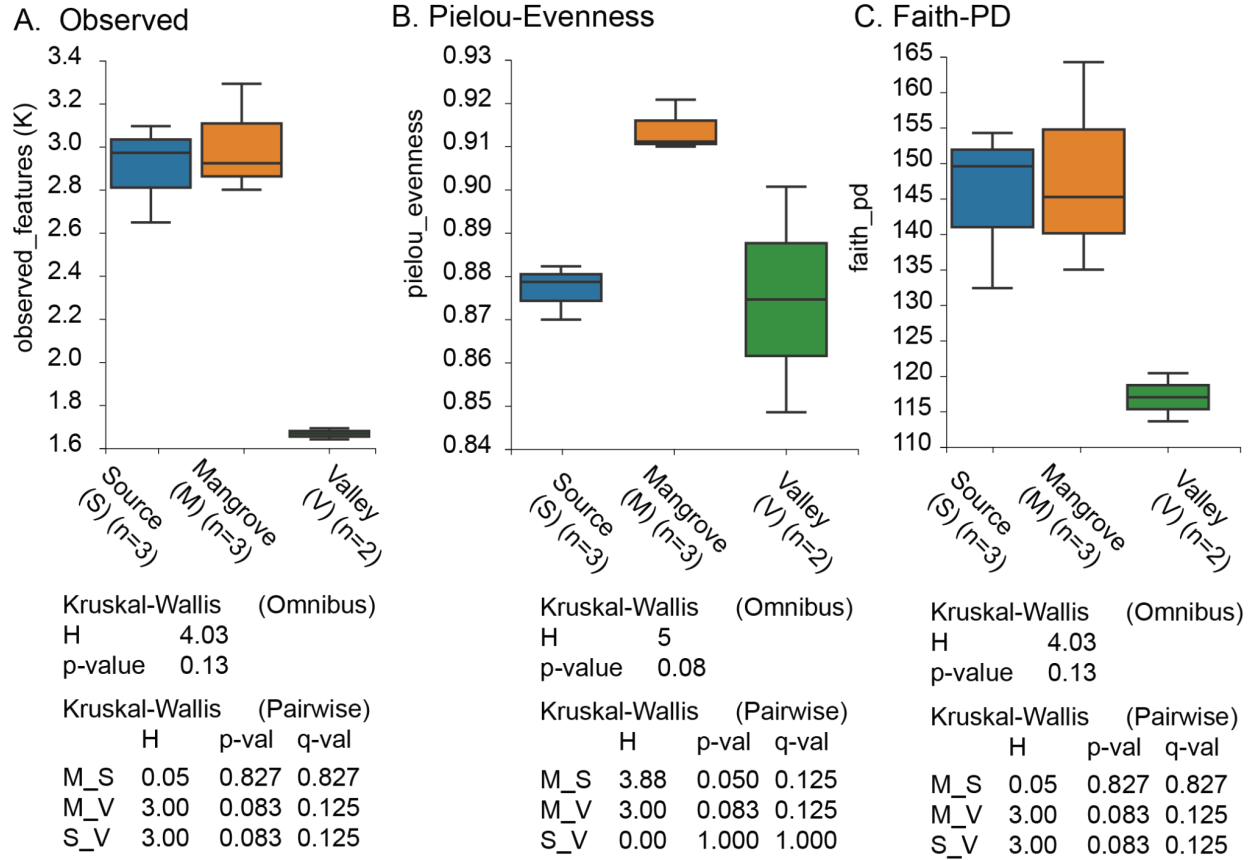

**Supplemental Figure 2. Alpha-diversity tests.**

All alpha-diversity tests were conducted using QIIME2 on rarefied samples (p-max-depth = 41000). All tests of significance used Kruskal-Wallis.

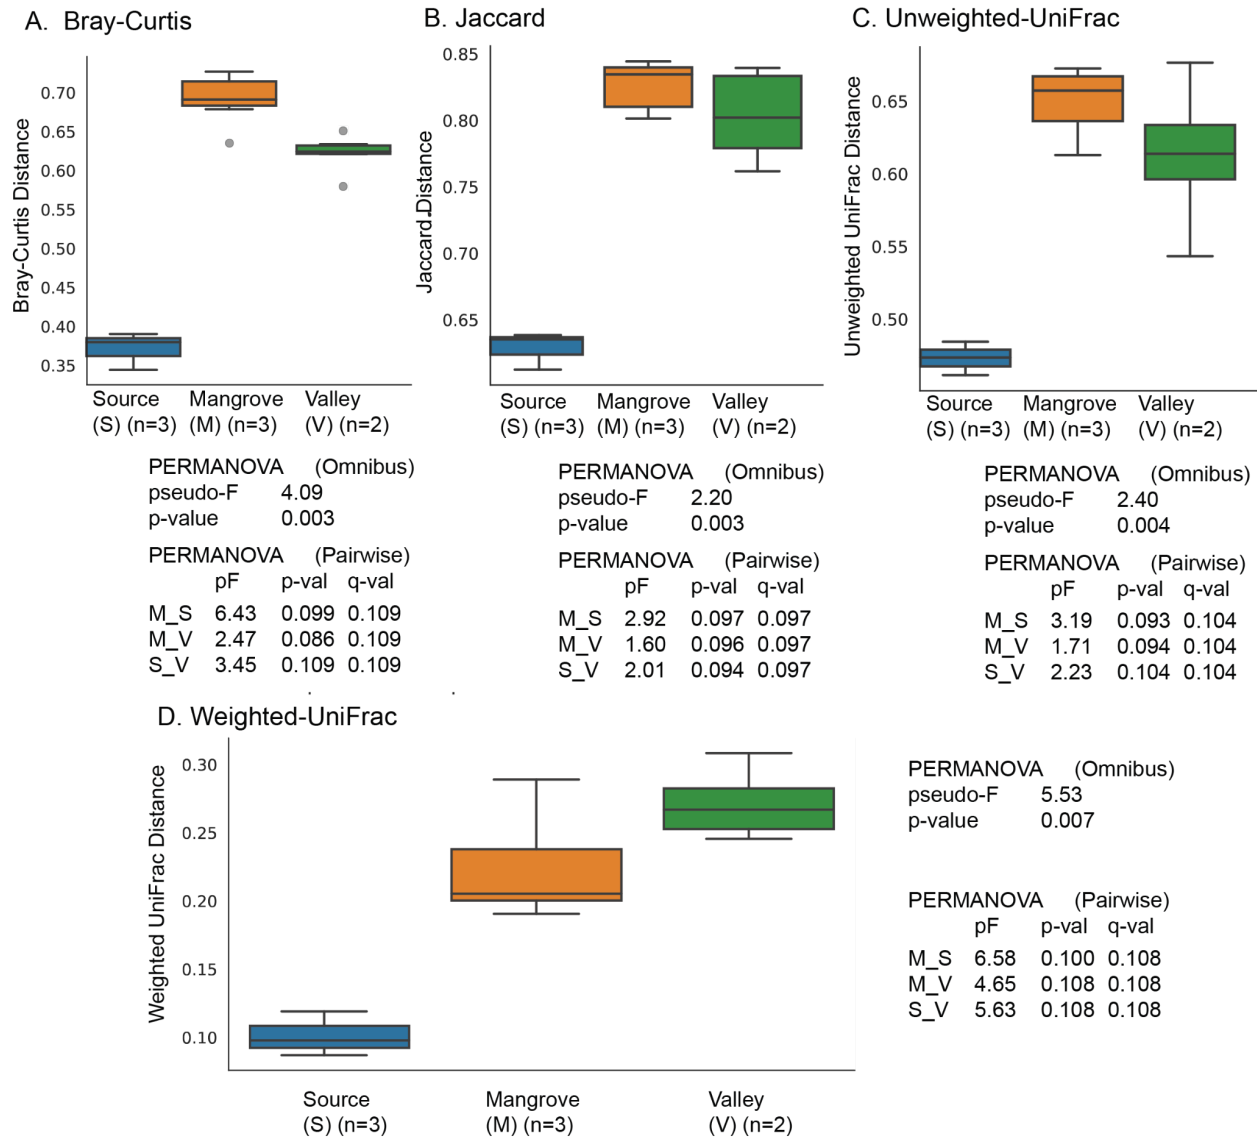

**Supplemental Figure 3. Beta-diversity tests.**

All beta-diversity tests were conducted using QIIME2 on rarefied samples (p-max-depth = 41000). All tests used PERMANOVA on eight samples in three groups and were permuted 999 times. All figures show the distances between sites relative to the Source.

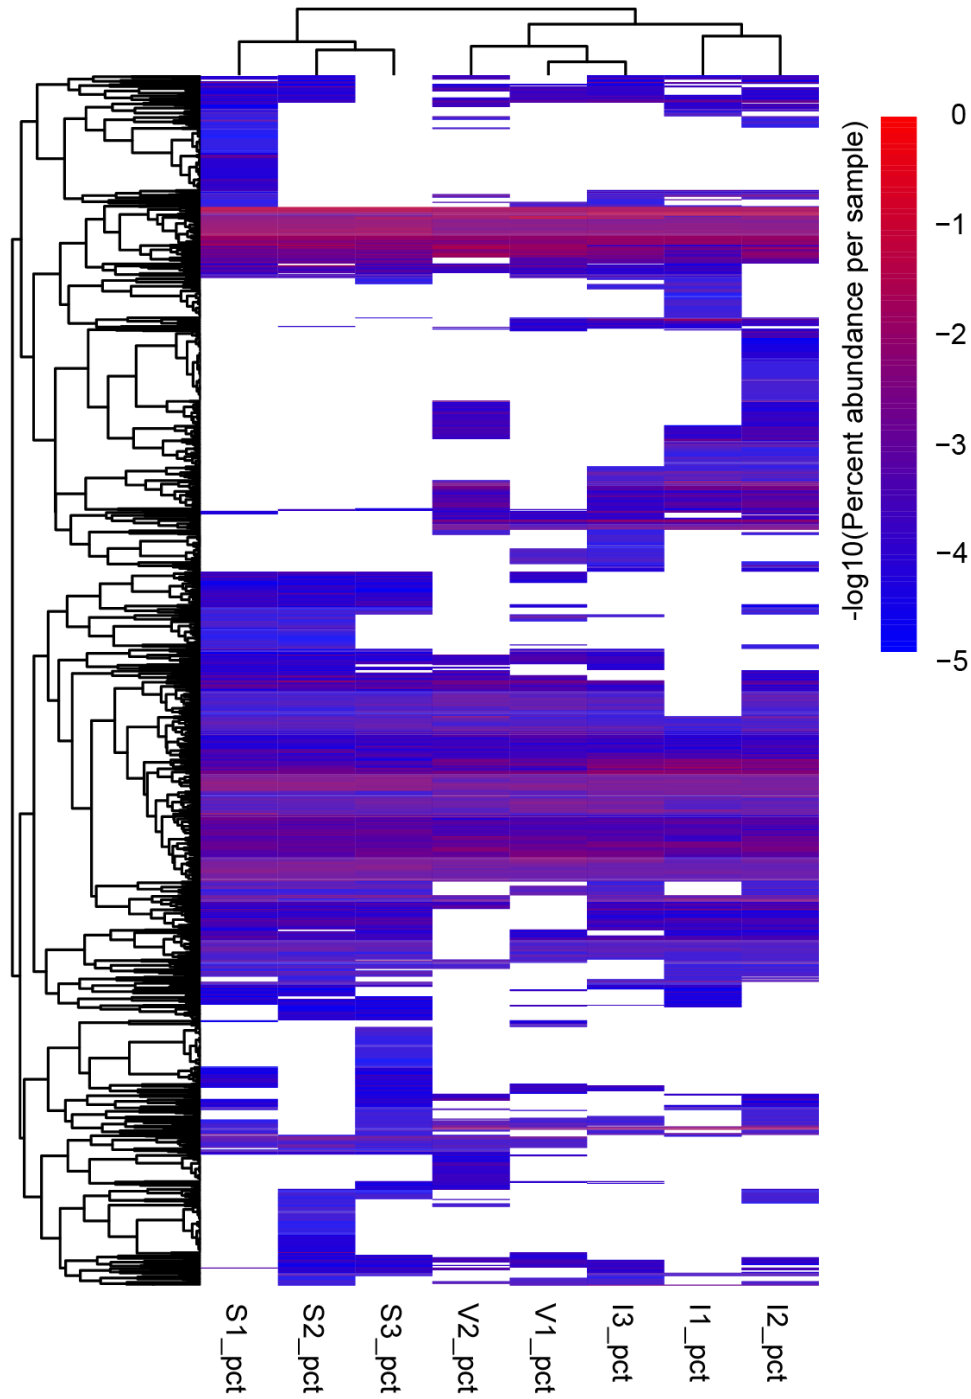

**Supplemental Figure 4. Taxa abundance heatmap.**

To better visualize the taxonomic diversity of the sites we represent relative abundance for each sample. Percent abundance is calculated per sample, then  $\log_{10}$  transformed for visualization purposes. Higher abundance taxa are shown in red, lower abundance in blue. Not all taxa are present in all replicates, absence is denoted by white.

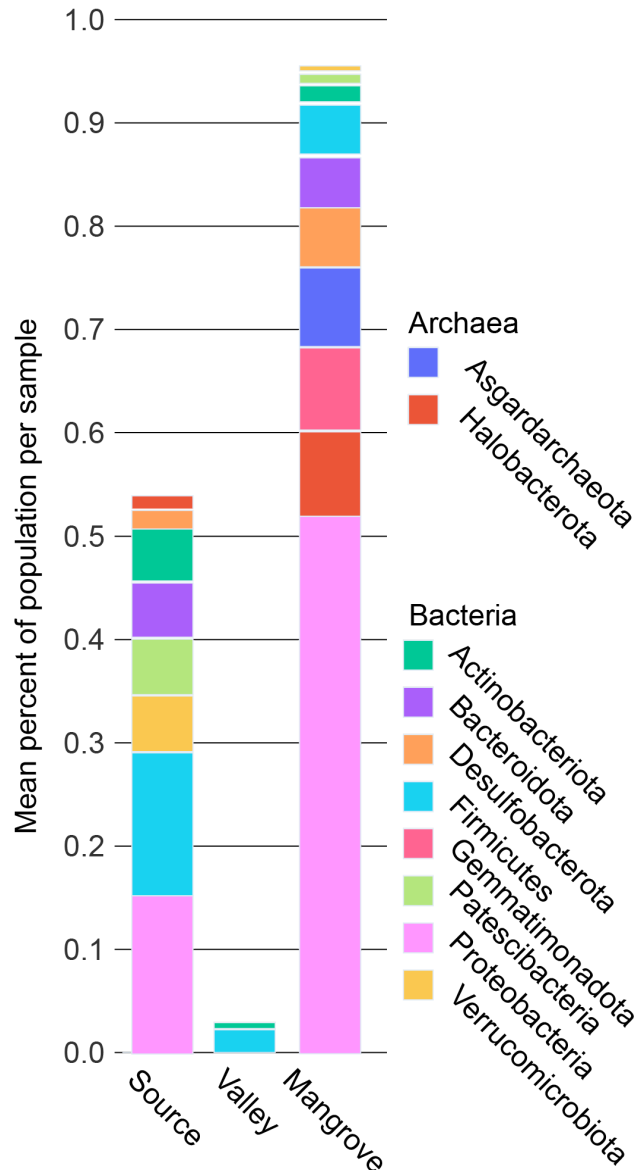

**Supplemental Figure 5. Singular genera.**

Figure shows the phylum level sums of genera that were present in only one site. Note that these singular genera are less than 1% of the total population at each site. The highest relative abundance genus is the Gammaproteobacteria FGL7S (0.076% of total population in Mangrove), followed by the Gammaproteobacteria Thiobacillus (0.041%, Mangrove). The highest relative abundance taxa is the Gammaproteobacteria order Chromatiales was also identified as being only present in the Mangrove site (0.109%). A complete table is available as a supplemental (Supplemental Table 8).

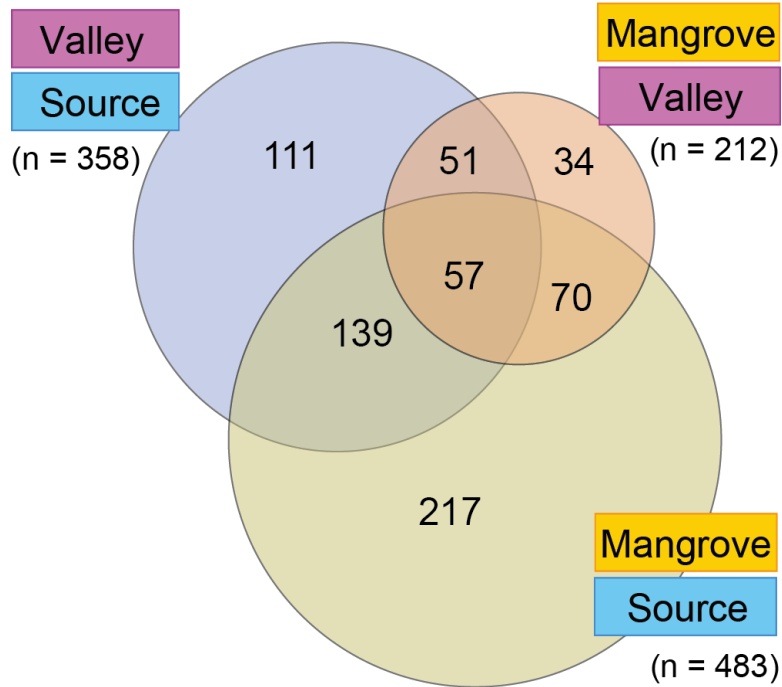

**Supplemental Figure 6. Overlap in taxa with significantly different abundances between sites.**

Taxa, resolved down to genus level, that are significantly different between pairwise comparisons of sites (ANCOM-BC, q-value <0.05) are shown as circles. Venn diagram overlap of these circles indicates taxa that are significantly different between two or three of these pairwise comparisons.

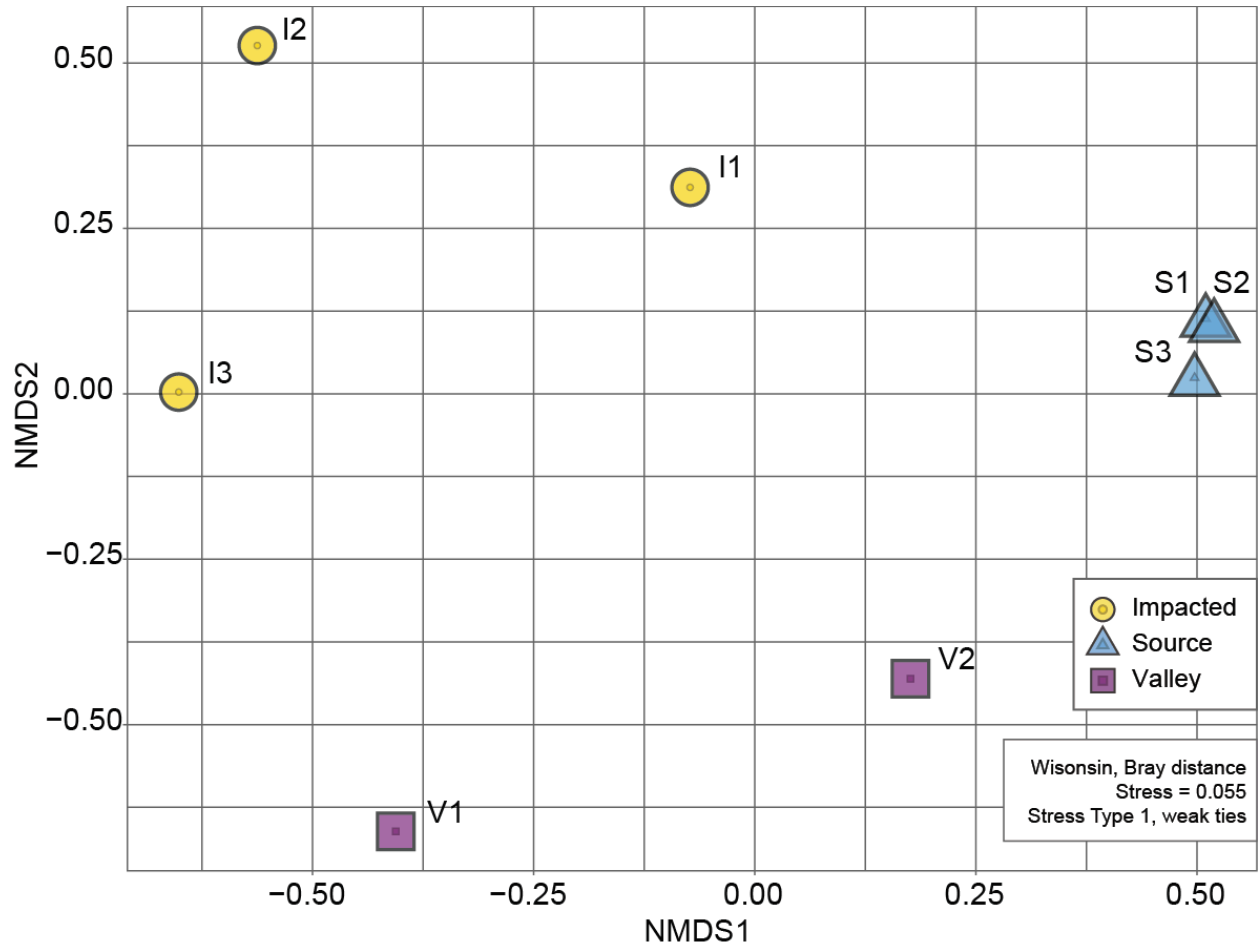

Supplemental Figure 7. NMDS plot



## Supplemental Tables

| <b>Site</b>       | <b>Sample-id</b> | <b>Temperature</b> | <b>D.O.</b> | <b>pH</b> | <b>Salinity</b> |
|-------------------|------------------|--------------------|-------------|-----------|-----------------|
| Source            | S1               | 29.9               | 7.76        | 7.07      | 0               |
| Source            | S2               | 30.4               | 6.07        | 6.79      | 0               |
| Source            | S3               | 29.9               | 7.11        | 7.07      | 0               |
| Valley            | V2               | 30.9               | 9.35        | 7.26      | 0               |
| Valley            | V3               | 31                 | 9.26        | 6.8       | 0               |
| Impacted-Mangrove | I1               | 29.7               | 8.41        | 7.45      | 13.3            |
| Impacted-Mangrove | I2               | 29.3               | 8.11        | 7.47      | 13.3            |
| Impacted-Mangrove | I3               | 29                 | 8.11        | 7.47      | 13.3            |

| <b>Sample-id</b> | <b>O. M.</b> | <b>Zn</b> | <b>Cu</b> | <b>Pb</b> | <b>Cr</b> | <b>Ni</b> | <b>Cd</b> |
|------------------|--------------|-----------|-----------|-----------|-----------|-----------|-----------|
| S1               | 8.96         | 0.14      | 0.14      | 0.02      | 0.1       | 0.02      | 0         |
| S2               | 8.75         | 0.14      | 0.14      | 0.02      | 0.1       | 0.02      | 0         |
| S3               | 8.88         | 0.14      | 0.14      | 0.02      | 0.1       | 0.02      | 0         |
| V2               | 6.67         | 0.07      | 0.02      | 0.01      | 0.1       | 0.01      | 0         |
| V3               | 6.67         | 0.07      | 0.02      | 0.01      | 0.1       | 0.01      | 0         |
| I1               | 9.93         | 0.63      | 0.13      | 0         | 0.13      | 5.17      | 0         |
| I2               | 9.81         | 1.01      | 0.18      | 0.01      | 0.01      | 7.86      | 0         |
| I3               | 9.9          | 0.63      | 0.18      | 0         | 0.16      | 7.86      | 0         |

**Supplemental Table 1. Measured environmental variables**

FWD: GTGCCAGCMGCCGCGGTAA  
REV: GGACTACHVGGGTWTCTAAT

From: Caporaso, J. G., Lauber, C. L., Walters, W. A., Berg-Lyons, D., Lozupone, C. A., Turnbaugh, P. J., Noah Fierer, N., & Knight, R. (2011). Global patterns of 16S rRNA diversity at a depth of millions of sequences per sample. *Proc Natl Acad Sci USA* 108, 4516–4522.  
<http://doi.org/10.1073/pnas.1000080107>

**Supplemental Table 2. Primers used in this study**

| Site     | Sample_name | input  | filtered | percentage passed filter |
|----------|-------------|--------|----------|--------------------------|
| Source   | I1          | 210701 | 195847   | 92.95                    |
| Source   | I2          | 188197 | 172770   | 91.8                     |
| Source   | I3          | 207034 | 192356   | 92.91                    |
| Impacted | S1          | 217495 | 202531   | 93.12                    |
| Impacted | S2          | 218935 | 203314   | 92.87                    |
| Impacted | S3          | 203580 | 188949   | 92.81                    |
| Valley   | V1          | 117154 | 105178   | 89.78                    |
| Valley   | V2          | 113141 | 97367    | 86.06                    |

| Sample_name | denoised | merged | percentage merged | Non-chimeric | Percentage non-chimeric |
|-------------|----------|--------|-------------------|--------------|-------------------------|
| I1          | 185479   | 118785 | 56.38             | 108360       | 51.43                   |
| I2          | 160887   | 108244 | 57.52             | 103627       | 55.06                   |
| I3          | 182781   | 123340 | 59.57             | 113229       | 54.69                   |
| S1          | 194860   | 158272 | 72.77             | 148406       | 68.23                   |
| S2          | 196307   | 169337 | 77.35             | 162089       | 74.04                   |
| S3          | 181558   | 150083 | 73.72             | 142027       | 69.76                   |
| V1          | 97765    | 64048  | 54.67             | 60236        | 51.42                   |
| V2          | 87950    | 43068  | 38.07             | 41479        | 36.66                   |

**Supplemental Table 3. Denoising data quality control statistics. Reads were filtered, denoised, merged, and tested for chimera by Qiime2. All analysis in this study is based on the Non-chimeric reads.**

**Supplemental Table 4. ASV feature table.**

Generated by QIIME2, supplemental file 1.

**Supplemental Table 5. Taxa feature table.**

Generated by QIIME2, supplemental file 1.

**Supplemental Table 6. Genus level feature table.**

Generated by QIIME2, supplemental file 1.

**Supplemental Table 7. Stable genus.**

Generated by Supplemental file 4. Collection of taxa, resolved down to the genus level, common between all sites. Taxa are required to have a relative abundance of at least 0.1% of reads per site, in at least 2 replicates per site, or at least 1% of reads in one replicate.

**Supplemental Table 8. Singular genus**

Generated by Supplemental file 5. Taxa are required to be minimally present at only one site. Minimal presence was defined as being greater than 0.001% of the total population per site, or being, on average, greater than 0.0001% of the population per site per replicate.

**Supplemental Table 9. Results of ANCOM-BC between Spring and Valley.**

Generated by QIIME2, supplemental file 1.

**Supplemental Table 10. Results of ANCOM-BC between Valley and Mangrove.**

Generated by QIIME2, supplemental file 1.

**Supplemental Table 11. Results of ANCOM-BC between Mangrove and Spring.**

Generated by QIIME2, supplemental file 1.

|           | <b>I1</b> | <b>I2</b> | <b>I3</b> | <b>S1</b> | <b>S2</b> | <b>S3</b> | <b>V1</b> |
|-----------|-----------|-----------|-----------|-----------|-----------|-----------|-----------|
| <b>I2</b> | 0.3666529 |           |           |           |           |           |           |
| <b>I3</b> | 0.35278   | 0.3785686 |           |           |           |           |           |
| <b>S1</b> | 0.717329  | 0.693554  | 0.6753772 |           |           |           |           |
| <b>S2</b> | 0.731515  | 0.699396  | 0.684452  | 0.2535798 |           |           |           |
| <b>S3</b> | 0.724365  | 0.683713  | 0.61573   | 0.300265  | 0.3210206 |           |           |
| <b>V1</b> | 0.693087  | 0.607335  | 0.476489  | 0.694608  | 0.704574  | 0.6173968 |           |
| <b>V2</b> | 0.704052  | 0.522712  | 0.666436  | 0.757814  | 0.767188  | 0.744857  | 0.515989  |

Call:

metaMDS(comm = veganifyOTU(physeq), distance = distance)

global Multidimensional Scaling using monoMDS

Data: wisconsin(sqrt(veganifyOTU(physeq)))

Distance: bray

Dimensions: 2

Stress: 0.05564482

Stress type 1, weak ties

Best solution was repeated 4 times in 20 tries

The best solution was from try 15 (random start)

Scaling: centring, PC rotation, halfchange scaling

Species: expanded scores based on 'wisconsin(sqrt(veganifyOTU(physeq)))'

**Supplemental Table 12. Bray\_distance\_matrix.txt**

\*\*\*VECTORS

|                    | <b>PC1</b> | <b>PC2</b>    | <b>r2</b> | <b>Pr(&gt;r)</b> |
|--------------------|------------|---------------|-----------|------------------|
| <b>Temperature</b> | 0.86199    | 0.50693       | 0.5877    | 0.107            |
| <b>D.O.</b>        | 0.98066    | -0.1957       | 0.5975    | 0.118            |
| <b>pH</b>          | -0.27208   | -0.96227      | 0.3293    | 0.356            |
| <b>Salinity</b>    | -0.20165   | -0.97946      | 0.4082    | 0.292            |
| <b>O.M.</b>        | -0.88273   | -0.46988      | 0.5704    | 0.122            |
| <b>Zn</b>          | -0.33603   | -0.94185      | 0.6532    | 0.063            |
| <b>Cu</b>          | -0.95061   | -0.31039      | 0.7979    | 0.011            |
| <b>Pb</b>          | -0.76224   | 0.64729       | 0.2925    | 0.451            |
| <b>Cr</b>          | 0.27174    | 0.96237       | 0.3779    | 0.298            |
| <b>Ni</b>          | -0.34514   | -0.93855      | 0.4413    | 0.23             |
| <b>Cd</b>          | 0          | 0             | 0         | 1                |
| ---                |            |               |           |                  |
| Signif.            | codes:     | '*' 0.05      | '.' 0.1   |                  |
| Permutation:       | free       |               |           |                  |
| Number             | of         | permutations: | 999       |                  |

**Supplemental Table 13. PCA\_results**

## Supplemental Files

### **Supplemental File 1. QIIME2 commands.**

File name: Qiime\_Project\_Osun\_6.sh

Contains DADA2, ASV to taxa assignment, taxonomic collapse to taxonomic levels, rarefaction, alpha-diversity, beta-diversity, ANCOM-BC.

### **Supplemental File 2. High relative abundance classes and phyla as barplots**

File name: Make\_stacked\_bar\_plots.py

Used in the generation of figure 1A

### **Supplemental File 3. Relative abundance heatmap plot.**

File name: Heatmap.R

Used to generate Supplemental figure 4

### **Supplemental File 4. Stable genera identification and plotting.**

File name: stable\_genus.py

Used to generate Figure 1B, Supplemental Table 7.

### **Supplemental File 5. Singular genera identification and plotting.**

File name: singular\_genus.py

Used to generate Supplemental Figure 5, Supplemental Table 8

### **Supplemental File 6. ANCOM-BC plotting and plotting.**

File name: volcano\_plot\_ancom.py

Used to generate Figure 3A, B, C.

### **Supplemental File 7. NMDS using Bray-Curtis**

File name: Ordinate\_nmds\_bc.r

Used to generate Supplemental Figure 7, Supplemental Table 12

### **Supplemental File 8. PCA using Envfit**

File name: envfit.r

Used to generate Figure 4B, Supplemental Table 13
